# Supplementary material for: Salivary DNA Methylation as an Epigenetic Biomarker for Head and Neck Cancer. Part I: A Diagnostic Accuracy Meta-Analysis
Source: MDPI journal article supplement (doi:10.3390/jpm11060568), 2021-06-17
Supplement: s1 [file s1]

## Supplementary Material

# Salivary DNA methylation as an epigenetic biomarker for head and neck cancer. Part I: A diagnostic accuracy meta-analysis

Óscar Rapado-González, Cristina Martínez-Reglero, Ángel Salgado-Barreira, Laura Muínelo-Romay, Juan Muínelo-Lorenzo, Rafael López-López, Ángel Díaz-Lagares and María Mercedes Suárez-Cunqueiro

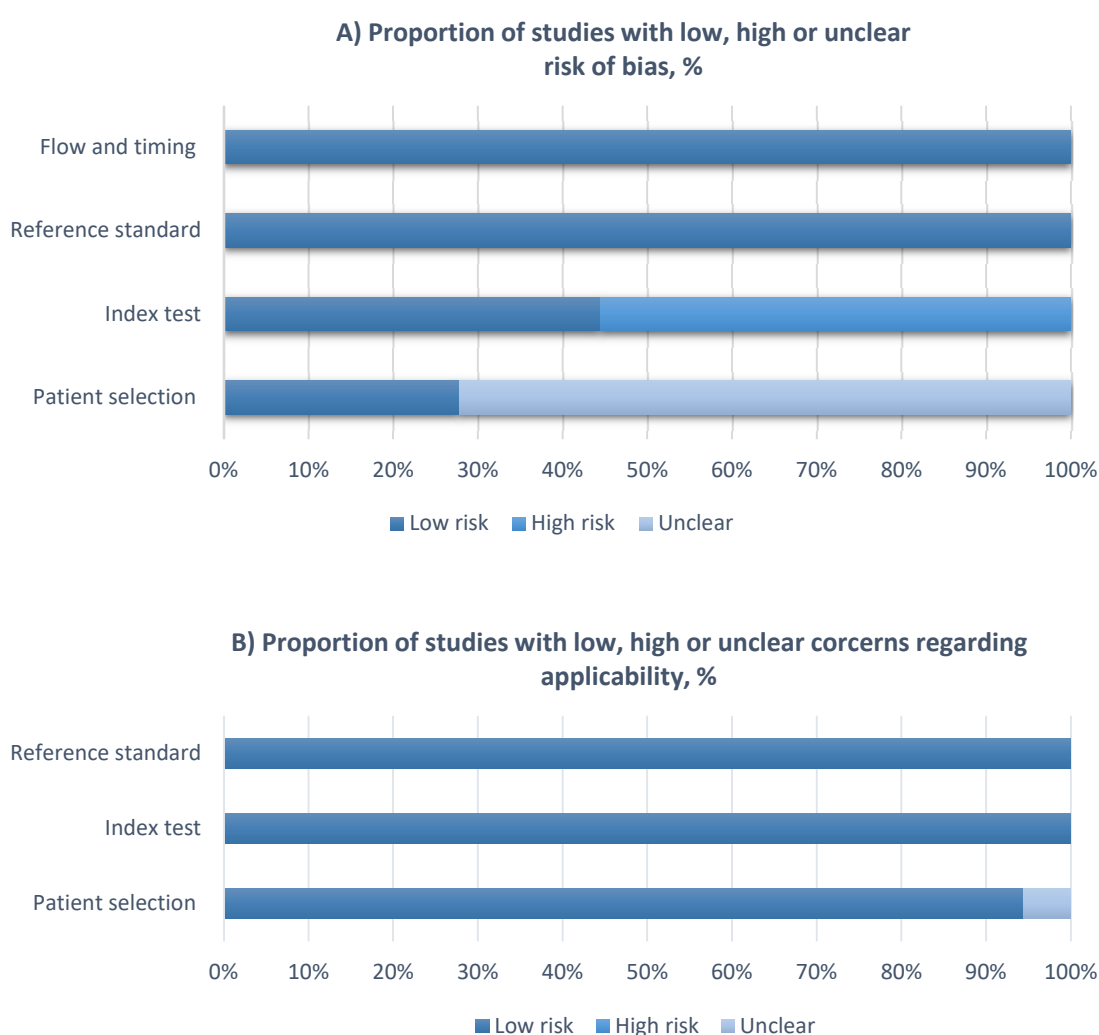

**Figure S1.** Quality assessment of the included studies according to Quality Assessment of Diagnostic Accuracy Studies-2 (QUADAS-2) criteria. **(A)** Proportion of studies with low, high, or unclear risk of bias. **(B)** Proportion of studies with low, high, or unclear concerns regarding applicability.

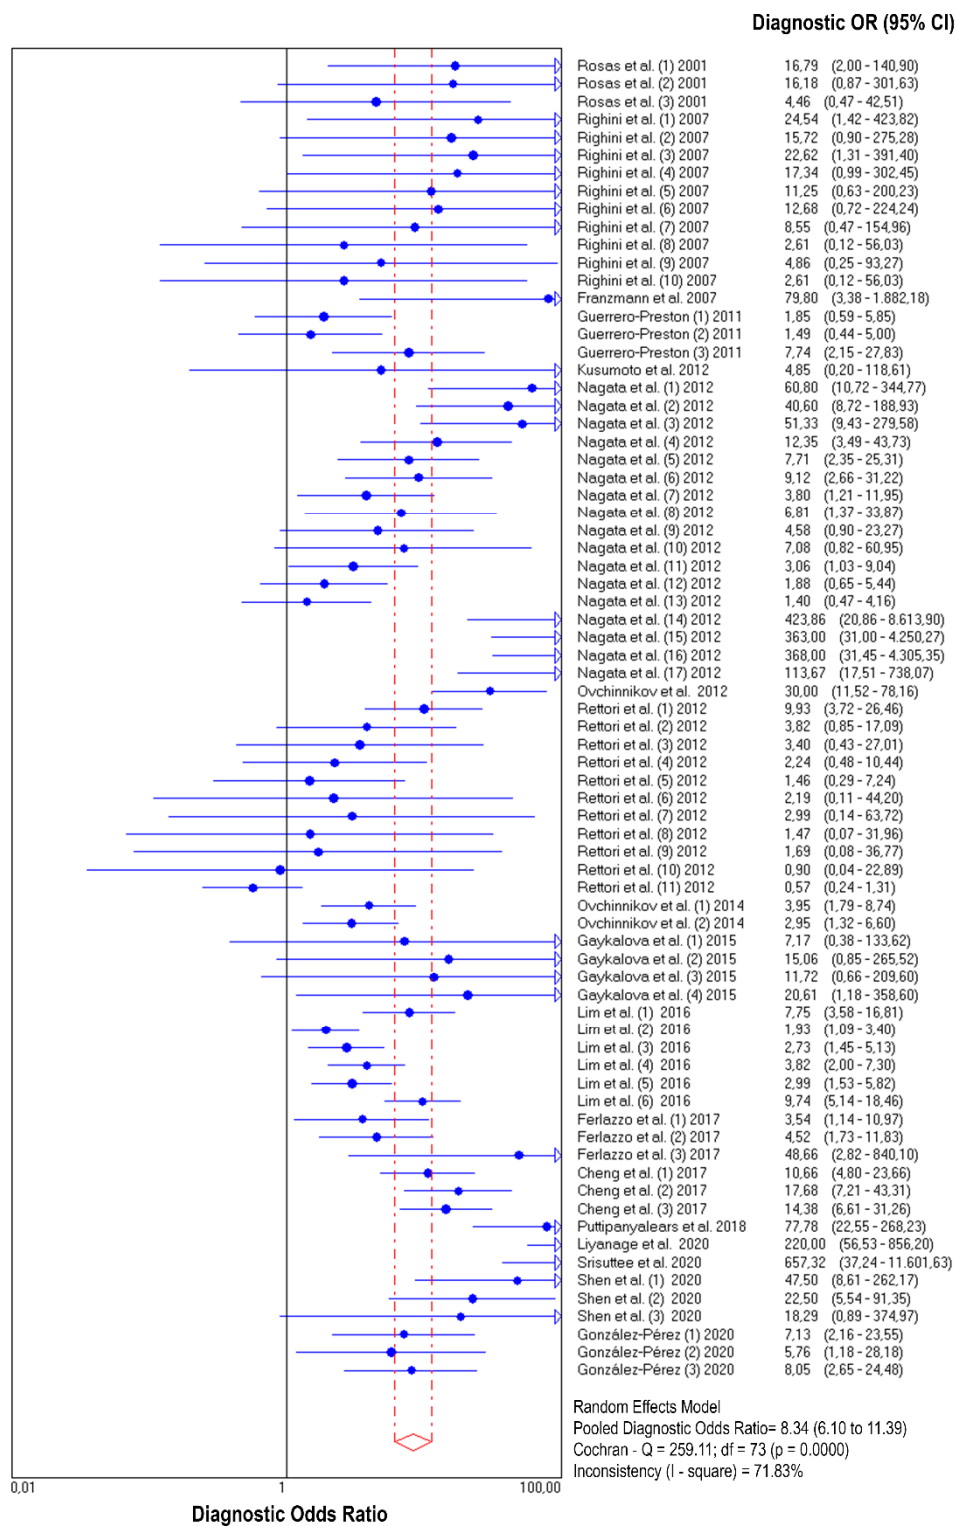

**Figure S2.** Forest plot of pooled dOR salivary DNA methylation for the diagnosis of HNC. Abbreviations: dOR = diagnostic Odds Ratio; HNC = head and neck cancer.

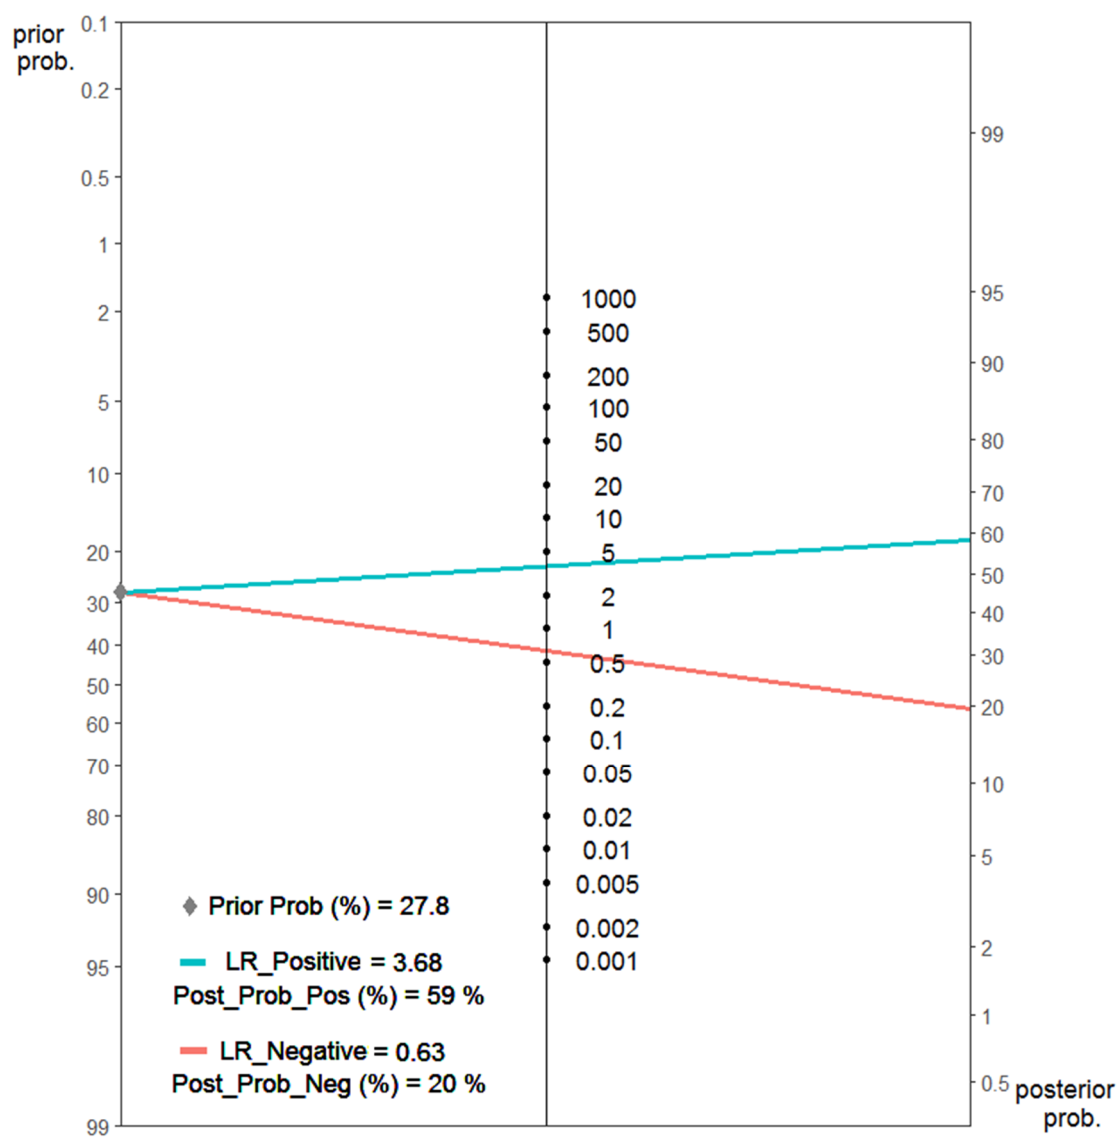

**Figure S3.** Fagan's monogram evaluating the clinical utility of salivary DNA methylation for differentiating HNC patients. *Abbreviations:* HNC = head and neck cancer.

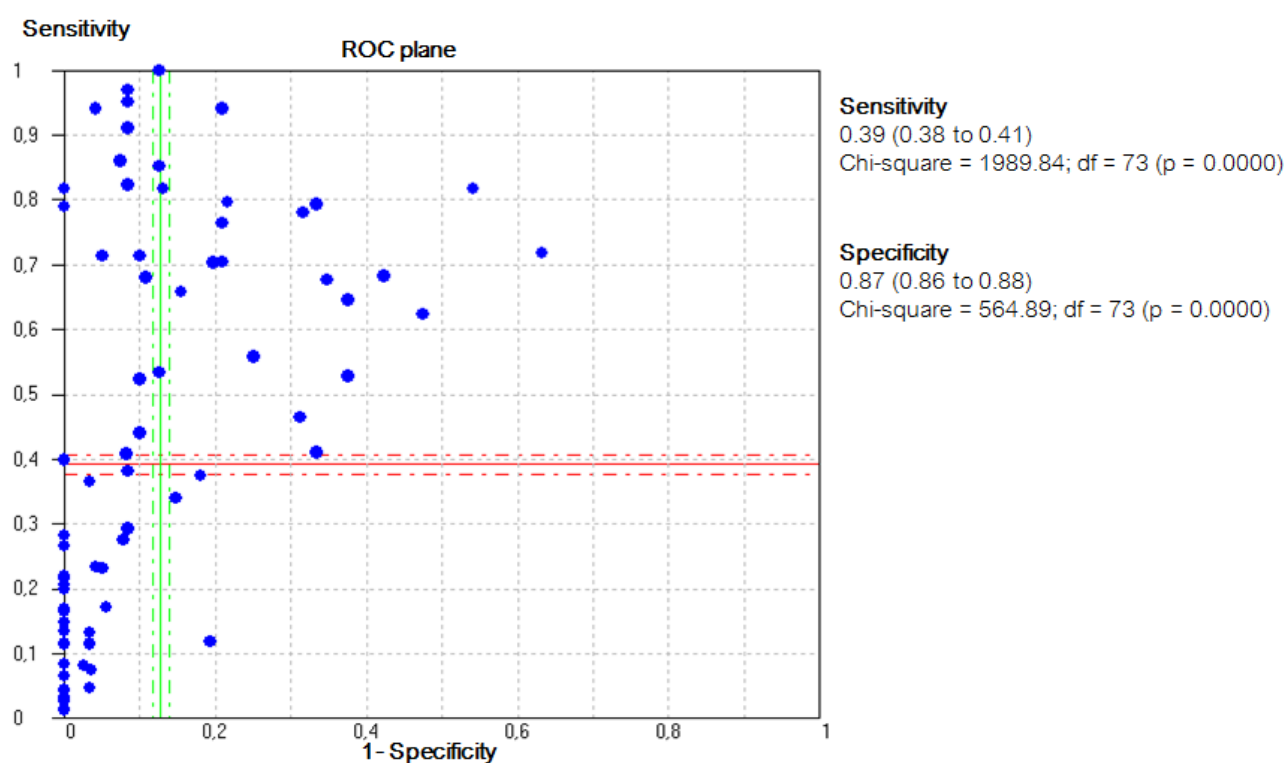

**Figure S4.** Representation of sensitivity against (1-specificity) in ROC space for each study of salivary methylation in the diagnosis of HNC. *Abbreviations:* ROC = summary receiver operator characteristic; HNC = head and neck cancer.

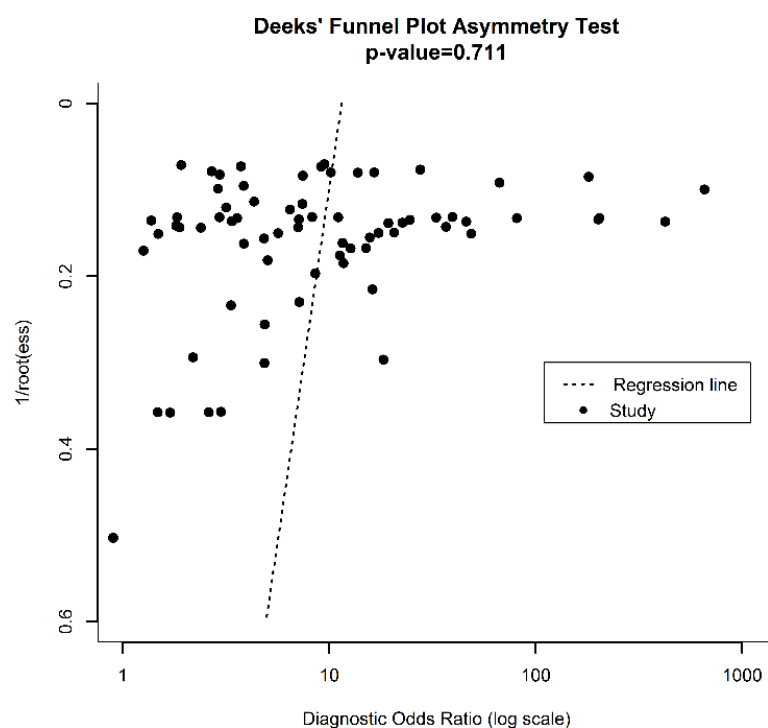

**Figure S5.** Deeks' funnel plot asymmetry test for the assessment of potential bias of included studies.

**Table S1.** Results of regression meta-analysis.

| Var                     | Coeff. | <i>p</i> -value | RDOR | [95%CI]     |
|-------------------------|--------|-----------------|------|-------------|
| Cte.                    | -1.549 | 0.0592          | -    | -           |
| S                       | 0.023  | 0.7139          | -    | -           |
| Sample type             | 0.739  | 0.1276          | 2.09 | (0.81;5.44) |
| Anatomic tumor location | 0.631  | 0.0204          | 1.88 | (1.11;3.19) |
| Technique               | -0.483 | 0.2752          | 0.62 | (0.26;1.48) |
| Gene profiling          | 1.502  | 0.0000          | 4.49 | (2.34;8.62) |
| Sample size             | 0.371  | 0.3493          | 1.45 | (0.66;3.18) |

  

| Var                     | Coeff. | <i>p</i> -value | RDOR | [95%CI]     |
|-------------------------|--------|-----------------|------|-------------|
| Cte.                    | -0.864 | 0.1082          | -    | -           |
| S                       | 0.021  | 0.7316          | -    | -           |
| Anatomic tumor location | 0.731  | 0.0016          | 2.08 | (1.33;3.24) |
| Gene profiling          | 1.421  | 0.0000          | 4.14 | (2.19;7.84) |

No. studies = 74.

Filter OFF.

Add ½ to all cells of the studies with zero.

Abbreviations: CI = confidence interval; Coeff. = coefficient; Std. Err. = standard error; RDOR = relative diagnostic odds ratios.

**Table S2.** Subgroup analysis of salivary DNA methylation for HNC detection based on different covariates.

| Subgroups               | No of study units | Sensitivity (95% CI) | I <sup>2</sup> (%) | Specificity (95% CI) | I <sup>2</sup> (%) | PLR (95% CI)     | I <sup>2</sup> (%) | NLR (95% CI)     | I <sup>2</sup> (%) | DOR (95% CI)        | I <sup>2</sup> (%) | AUC (95% CI)     |
|-------------------------|-------------------|----------------------|--------------------|----------------------|--------------------|------------------|--------------------|------------------|--------------------|---------------------|--------------------|------------------|
| Total                   | 74                | 0.39 (0.38-0.41)     | 96.33              | 0.87 (0.86-0.88)     | 87.07              | 3.68 (2.97-4.57) | 73.99              | 0.63 (0.57-0.69) | 96.35              | 8.34 (6.10-11.38)   | 71.83              | 0.81 (0.77-0.84) |
| Sample type             |                   |                      |                    |                      |                    |                  |                    |                  |                    |                     |                    |                  |
| Saliva                  | 16                | 0.55 (0.52-0.57)     | 94.98              | 0.81 (0.79-0.83)     | 92.30              | 3.04 (2.20-4.21) | 82.52              | 0.57 (0.47-0.69) | 90.55              | 6.33 (3.90-10.27)   | 79.34              | 0.78 (0.72-0.83) |
| Oral Rinse              | 58                | 0.34 (0.32-0.35)     | 96.28              | 0.91 (0.90-0.92)     | 81.02              | 4.07 (3.08-5.39) | 66.18              | 0.65 (0.59-0.73) | 96.39              | 9.42 (6.30-14.08)   | 67.84              | 0.82 (0.78-0.86) |
| Samples size            |                   |                      |                    |                      |                    |                  |                    |                  |                    |                     |                    |                  |
| >100                    | 25                | 0.43 (0.41-0.45)     | 97.64              | 0.84 (0.83-0.86)     | 91.61              | 3.24 (2.35-4.46) | 84.32              | 0.56 (0.46-0.67) | 97.79              | 6.88 (4.24-11.19)   | 84.15              | 0.79 (0.73-0.84) |
| <100                    | 49                | 0.35 (0.33-0.40)     | 94.89              | 0.91 (0.94-0.93)     | 80.63              | 4.12 (3.06-5.54) | 60.01              | 0.68 (0.61-0.76) | 94.46              | 9.58 (6.44-14.27)   | 53.11              | 0.82 (0.78-0.86) |
| Anatomic Tumor Location |                   |                      |                    |                      |                    |                  |                    |                  |                    |                     |                    |                  |
| HNC                     | 43                | 0.31 (0.29-0.33)     | 96.77              | 0.86 (0.85-0.87)     | 90.43              | 3.03 (2.27-4.03) | 73.63              | 0.75 (0.96-0.82) | 95.39              | 5.78 (3.86-8.67)    | 70.11              | 0.81 (0.75-0.88) |
| OC                      | 33                | 0.63 (0.60-0.65)     | 92.22              | 0.87 (0.85-0.89)     | 76.63              | 4.02 (2.99-5.41) | 73.79              | 0.40 (0.31-0.50) | 92.45              | 13.07 (8.19-20.88)  | 73.08              | 0.88 (0.84-0.93) |
| OPC                     | 8                 | 0.70 (0.62-0.77)     | 86.26              | 0.86 (0.81-0.89)     | 88.41              | 3.67 (2.88-4.69) | 88.67              | 0.41 (0.19-0.90) | 90.75              | 13.26 (3.17-55.42)  | 83.12              | 0.87 (0.72-1.00) |
| Technique               |                   |                      |                    |                      |                    |                  |                    |                  |                    |                     |                    |                  |
| MSP                     | 48                | 0.47 (0.45-0.49)     | 95.08              | 0.85 (0.83-0.86)     | 87.22              | 3.59 (2.81-4.57) | 72.53              | 0.59 (0.52-0.67) | 94.49              | 9.06 (6.30-13.03)   | 70.46              | 0.82 (0.78-0.85) |
| qMSP                    | 26                | 0.29 (0.27-0.31)     | 97.15              | 0.92 (0.90-0.93)     | 84.79              | 3.65 (2.31-5.77) | 76.18              | 0.69 (0.60-0.79) | 97.12              | 6.81 (3.70-12.54)   | 74.82              | 0.78 (0.71-0.86) |
| Gene profiling          |                   |                      |                    |                      |                    |                  |                    |                  |                    |                     |                    |                  |
| Single gene             | 62                | 0.32 (0.31-0.34)     | 95.45              | 0.87 (0.86-0.88)     | 88.12              | 3.17 (2.53-3.97) | 69.76              | 0.71 (0.66-0.77) | 94.50              | 6.02 (4.45-8.13)    | 62.54              | 0.77 (0.73-0.81) |
| Combination gene        | 12                | 0.73 (0.69-0.76)     | 95.29              | 0.88 (0.58-0.91)     | 78.40              | 5.76 (3.92-8.48) | 54.71              | 0.22 (0.12-0.40) | 96.78              | 36.97 (16.81-81.32) | 73.62              | 0.92 (0.88-0.96) |

*Abbreviations:* AUC = area under the SROC; dOR = diagnostic Odds Ratio; PLR = positive likelihood ratio; NLR = negative likelihood ratio; CI = confidence interval; HNC = head and neck cancer; OC = oral cancer; OPC = oropharyngeal cancer; MSP = methylation-specific polymerase chain reaction; qMSP = quantitative-MSP.
